# Supplementary material for: Psychometric Assessment of the European Health Literacy Survey Questionnaire (HLS-EU-Q16) for Arabic/French-Speaking Migrants in Southern Europe
Source: PubMed Central journal article supplement (PMC7663905; doi:10.3390/ijerph17218181), 2020-11-05
Supplement: ijerph-17-08181-s001.pdf [file ijerph-17-08181-s001.pdf]

Table S1. Final Arabic/ French version

| Arabic                                                                                                                                                                                                                                | French                                                                                                                                                                                                                                                                                                         |
|---------------------------------------------------------------------------------------------------------------------------------------------------------------------------------------------------------------------------------------|----------------------------------------------------------------------------------------------------------------------------------------------------------------------------------------------------------------------------------------------------------------------------------------------------------------|
| الحصول على معلومات عن علاجات متعلقة بأمراض تهتك معرفة أين يمكن الحصول على المساعدة الطبية عندما تكون مريضاً (مثل طبيب أو صيدلي أو طبيب نفسي) فهم ما يقوله الطبيب فهم تعليمات الطبيب أو الصيدلي المتعلقة بكيفية تناول الأدوية الموصوفة | Trouver des informations sur les traitements liés aux maladies qui sont de votre intérêt.<br>Repérer où trouver de l'aide professionnelle quand on est malade<br>Comprendre ce que dit le medecin<br>Comprendre les indications du médecin ou du pharmacien sur la manière de prendre les médicaments inscrits |
| تقييم متى تكون بحاجة إلى رأي طبي ثاني استعمال المعلومات المقدمة من طرف الطبيب لإتخاذ قرارات تتعلق بمرضك إتباع تعليمات الطبيب أو الصيدلي                                                                                               | Envisager quand peut avoir besoin d'un deuxième diagnostic d'un autre médecin<br>Utiliser l'information fournit par le médecin pour soigner la maladie<br>Suivre les inscriptions de son médecin ou de son pharmacien.                                                                                         |
| أو الإجهاد بطريقة التعامل مع مشاكل الأمراض العقلية مثل الاكتئاب                                                                                                                                                                       | Suivre les renseignements pour trouver la solution aux problèmes mentaux comme le stress ou les troubles dépressifs                                                                                                                                                                                            |
| فهم التحذيرات الصحية المتعلقة ببعض العادات مثل التدخين أو ممارسة الرياضة أو الإفراط في شرب الكحول                                                                                                                                     | Comprendre les avertissements sanitaires liés aux habitudes comme les cigarettes, l'excès d'alcool, le manque des exercice physiques                                                                                                                                                                           |
| فهم لماذا تحتاج إلى اختبارات وفحوصات للكشف المبكر عن بعض الأمراض مثل فحص الثدي أو قياس نسبة السكر في الدم أو قياس الضغط                                                                                                               | Comprendre pourquoi on a besoin de faire des analyses de detection précoce de maladies ou des contrôles medicaux                                                                                                                                                                                               |
| تقييم ما إذا كان بإمكانك الوثوق بالمعلومات المتعلقة بالمخاطر الصحية و التي تظهر بوسائل مثل التلفاز الانترنت او في اي وسيلة اعلامية اخرى                                                                                               | Évaluer la fiabilité de l'information sur les risques contre la santé qui apparaissent sur les médias                                                                                                                                                                                                          |
| أن تقرر كيف تحمي نفسك من الأمراض بفضل المعلومات (... التي تقدمها وسائل الإعلام ( الإنترنت , الجرائد , المجلات الحصول على أنشطة مفيدة لسلامتك العقلية مثل الاسترخاء او المشي الخ                                                       | Décide comment se proteger contre les maladies grâce à l'information fournie par les médias<br>Trouver des activités appropriées à se tranquilisé mentalement                                                                                                                                                  |
| فهم النصائح الصحية المفيدة التي تقدمها العائلة و الأصدقاء                                                                                                                                                                             | Comprendre les conseils sur la santé fournie par la famille ou les amis.                                                                                                                                                                                                                                       |
| فهم المعلومات المقدمة من طرف وسائل الاعلام مثل الانترنت الجرائد المجلات حول كيفية تحسين صحتك                                                                                                                                          | Comprendre l'information fournie par les médias sur l'amélioration de sa santé                                                                                                                                                                                                                                 |

تقييم أي من عاداتك اليومية تؤثر على صحتك (التغذية ,  
(التدخين , التمارين الرياضية , إلخ) Évaluer les habitudes quotidiennes qui  
aident sa santé

Source: Own elaboration
